# Supplementary material for: Integrated analyses for genetic markers of polycystic ovary syndrome with 9 case-control studies of gene expression profiles
Source: PubMed Central journal article supplement (PMC5356873; doi:10.18632/oncotarget.13881), 2016-12-10
Supplement: oncotarget-08-3170-s001.pdf [file oncotarget-08-3170-s001.pdf]

## **Integrated analyses for genetic markers of polycystic ovary syndrome with 9 case-control studies of gene expression profiles**

### **Supplementary Materials**

**Supplementary Table S1: The 869 DEGs identified in two datasets from Muscle2.** See Supplementary\_Table\_S1

**Supplementary Table S2: The 287 DEGs identified in 6 datasets from PCOS6.** See Supplementary\_Table\_S2

**Supplementary Table S3: The result of DAVID gene ontology (GO) enrichment for 869 DEGs from Muscle2.** See Supplementary\_Table\_S3

**Supplementary Table S4: The result of DAVID GO enrichment for 287 DEGs from PCOS6.** See Supplementary\_Table\_S4

**Supplementary Table S5: The result of DAVID pathway enrichment for 869 DEGs from Muscle2.** See Supplementary\_Table\_S5

**Supplementary Table S6: The result of DAVID pathway enrichment for 287 DEGs from PCOS6.** See Supplementary\_Table\_S6
